# Supplementary material for: Dynamic and Steric Sea-level Changes due to a Collapsing AMOC in the Community Earth System Model
Source: Copernicus journal article supplement (doi:10.5194/egusphere-2025-5102), 2025-10-23
Supplement: Supplementary file [file egusphere-2025-5102-AC2-supplement.pdf]

**MS-No.:** egusphere-2025-5102

**Version:** Revision

**Title:** Dynamic and Steric Sea-level Changes due to a Collapsing AMOC in the Community Earth System Model

**Author(s):** René M. van Westen, Caroline A. Katsman and Dewi Le Bars

## Point-by-point reply to reviewer

January 16, 2026

We thank the reviewer for their careful reading and for the useful comments on the manuscript.

*van Westen et al. present an analysis of sea-level changes resulting from an AMOC collapse using a set of numerical experiments with the Community Earth System Model in which a freshwater hosing is performed over the North Atlantic regions to induce an AMOC collapse. The experiments used form an interesting model hierarchy to study sea-level changes with both low- and high-resolution ocean-only simulations, and a single low-resolution fully coupled simulation. Given the lack of previous studies, especially using modern ocean models, I think the results of the present study are timely. I think the manuscript is generally written to a good standard, structured appropriately, and the results presented with an appropriate degree of clarity. However, I do think the DSL analyses, and some of the claims made from these are limited by the absence of a reverse hosing simulation in the ocean-only configurations. Nevertheless, given the structure of the model hierarchy used, there is potential to better explain the mechanisms and how these compare between the different experiments of the present study. This could be important for interpreting DSL/TS sea level changes in other climate models. Lastly, I think computing the total stericodynamic sea level change would be helpful – currently it is hard to determine how significant the overall changes are. Ultimately, I suggest moderate revisions before publication in Ocean Sciences.*

### Specific comments:

1. *L8-11: I think it's good to include this information in the abstract, however, could the authors quote/estimate these values in terms of*

*mm/year sea-level rise? This would be helpful for readers to make a quick comparison to the overall DSL changes.*

**Author's reply:**

We agree with the reviewer that is good to have a reference for the AMOC-induced DSL changes. The observed global mean sea-level rise of  $+3.3 \text{ mm yr}^{-1}$  is well suited for such a reference. We are aware that local sea-level rise may deviate from the global mean and sea-level rise is also forcing dependent. The latter can be included in the discussion, but is too specific for the abstract.

**Changes in manuscript:**

We will rewrite parts of the abstract and discussion accordingly.

2. *L16: Somewhere in this paragraph I think it would be appropriate to cite:*

*Liu et al. Sci. Adv. (<https://doi.org/10.1126/sciadv.aaz4876>)*

*Bellomo and Mehling GRL. (<https://doi.org/10.1029/2023GL107624>)*

**Author's reply:**

These are indeed relevant references here.

**Changes in manuscript:**

These references will be incorporated in this paragraph.

3. *L35: Could also cite Baker et al. 2025, Nature (already cited in the manuscript).*

**Author's reply:**

Agreed.

**Changes in manuscript:**

The study will be mentioned here.

4. *L55-57: I think it would be better to split the Methods section more cleanly between each model used (e.g., with subheadings) and provide a little more information on the simulation components to make this a*

*more standalone manuscript. I understand these experiments have been used in several previous studies, but for completeness in the current paper I think the authors should at least briefly state which components of CESM are being used here (e.g., is this FV/spectral CAM; CICE? etc.). A short table would help.*

**Author’s reply:**

Agreed, we can expand on the descriptions of the LR-CESM and the two stand-alone POP simulations. We will introduce the LR-CESM in Section 2.1, together with information on the different CESM components. Section 2.2 describes the two stand-alone POP configurations in more detail.

**Changes in manuscript:**

We will rewrite the Methods with this comment in mind (Section 2).

5. *L98: The authors need to expand on this more. Critically, are there reasons to think that the hosing effect would be significantly different in these experiments? One of the main takeaways from the analysis performed in section 3.2 is that the hosing corrected, AMOC-induced DSL change is highly dependent on the AMOC state and hosing conditions, but this has only been explicitly calculated for one simulation. These effects could be highly dependent on the model resolution.*

**Author’s reply:**

We agree with the reviewer that the hosing-corrected DSL changes are highly dependent on the model (resolution) used and the AMOC state, which was demonstrated for the LR-CESM in Section 3.2. Unfortunately, this cannot be tested for the HR-POP and LR-POP due to computational limitations (lines 97 – 98), which is also discussed in the last section (lines 349 – 359). Nevertheless, this discussion can be expanded to address the opportunities and limitations of the analysed model output.

**Changes in manuscript:**

We will expand the discussion with regard to this topic.

6. *L146-159/Figure 2: The authors have not justified why they are using a linear fit for dynamic sea level difference and ‘Volume transport difference’ in figures 2.e-g. It’s potentially interesting if there is a well-justified physical relationship which holds over some region of the parameter space, but I think this should be far better justified/explained if it is to be included.*

**Author’s reply:**

The AMOC-DSL relation was already briefly described in lines 147 – 148, but this can be made more explicit following the reviewer’s suggestion. The AMOC is destabilised under the salt-advection feedback, leading to freshwater accumulation over the North Atlantic Ocean. This freshwater accumulation increases local DSLs (through lower densities), explaining the linear AMOC-DSL relation.

**Changes in manuscript:**

We will motivate the AMOC-DSL relation in greater detail.

7. *L152-153: I do not think this statement (as it is currently written) is justified by figure 2.*

**Author’s reply:**

Agreed, this should be quantified. We will quantify the deviations from the AMOC-DSL relation.

**Changes in manuscript:**

A quantitative assessment will be added in the revision (e.g., a Table in the Appendix).

8. *L180: This needs to be substantiated. For instance, which climate feedbacks and why?*

**Author’s reply:**

Agreed, we will further motivate these contributions. The LR-CESM and LR-POP only differ in their climate coupling, hence climate feedbacks (e.g., winds) are not represented in the LR-POP.

**Changes in manuscript:**

The text will be rewritten accordingly.

9. *L198: Ultimately it is up to the authors, but perhaps it would make more sense to discuss the magnitude of the hosing correction first? Or, even include this in the methods where it is first introduced? Presently, the reader is introduced to changes in DSL which initially appear very large, but the end of section 3.1 ends with an acknowledgment of the substantial hosing correction, and the correspondingly large reduction in DSL trends. Importantly, many figures show the uncorrected DSL results.*

**Author’s reply:**

The hosing contribution to DSLs is spatially and AMOC-state dependent over the North Atlantic Ocean, whereas other regions have a negligible hosing contribution. Over 100-year windows ( $\Delta F_H = 0.03$  Sv, Figure 3), the hosing contribution is relatively small and hence the DSL trends can be compared for the different models. Note that the hosing contribution to DSLs is the largest for LR-CESM ( $\Delta F_H = 0.66$  Sv), which is followed by the LR-POP ( $\Delta F_H = 0.45$  Sv), and is the smallest for the HR-POP ( $\Delta F_H = 0.18$  Sv). Nevertheless, we agree with the reviewer that it is good to already mention this in the Methods, but we will keep the overall outline of the manuscript.

**Changes in manuscript:**

We will further stress the (substantial) hosing contribution to DSLs in the Methods.

10. *L255-257 Here, LR-POP and LR-CESM yield significantly different responses at the same resolution – I think there is an opportunity here to explore the role of eddies in more depth than is currently presented.*

**Author’s reply:**

Please note that both the LR-CESM and LR-POP parameterise ocean eddy effects, the role of ocean eddies can only be analysed between the HR-POP and LR-POP. Nevertheless, the differences in the thermoclinic sea-level responses are discussed in lines 268 through 303. For example in Figure 8, the surface heat flux responses are quite similar between the models, except for the Southern Ocean region in the

LR-POP. The Southern Ocean responses are much larger for the LR-POP compared to the LR-CESM and HR-POP (line 287), explaining the intermodel thermosteric sea-level differences. The role of Southern Ocean eddies is discussed in lines 291 – 301.

**Changes in manuscript:**

No changes needed.

11. *L262: Only in the adiabatic limit.*

**Author’s reply:**

Correct, this is only valid under thermal wind balance and the adiabatic limit.

**Changes in manuscript:**

This will be included in the revision.

12. *L267: Ocean heat content can be easily computed from POP variables (fig. A3 partially addresses this).*

**Author’s reply:**

Correct, the ocean heat content responses are essentially shown by the volume-averaged temperatures in Figure A3.

**Changes in manuscript:**

We will add a reference to Figure A3 here.

13. *Figure 7: What is the difference in thermosteric sea level rise between the forward and backward simulations?*

**Author’s reply:**

The reviewer suggested (see reviewer’s introduction) to include the stericodynamic sea-level responses, which is a relevant suggestion. The stericodynamic sea-level responses also have the unintended hosing contribution when analysing the forward QE simulations, hence we will include an analysis on the global mean thermosteric sea-level changes using the full hysteresis simulation with the LR-CESM.

**Changes in manuscript:**

We will add a new section 4.2 and present the results on sterodynamic sea-level responses, together with the global mean thermohaline sea-level changes in the hysteresis simulation.

14. *L305-309: I think the authors need to take a lot more care here. Arguments based on a link between AMOC and TOA imbalance can only be applied to LR-CESM (as acknowledged). The surface fluxes are presumably the most important aspect - for instance, the surface fluxes in LR-CESM are not 0 prior to the AMOC collapse.*

**Author's reply:**

The reviewer is correct here. AMOC strength variations change the surface heat fluxes and they alter the TOA radiative imbalances.

**Changes in manuscript:**

We will rewrite this paragraph and other parts (abstract and discussion) of the manuscript.

15. *L340-342: How does this value compare to estimates of sea level rise due to accelerated melting of the Greenland (or Antarctic) ice sheet? How large is the overall sea level change due to AMOC collapse?*

**Author's reply:**

It is indeed good to compare the AMOC-induced DSL changes with the other sea-level rise contributions. The hosing simulations have constant greenhouse gas concentrations, hence we will compare the projected sea-level changes from the SSP scenarios.

**Changes in manuscript:**

We will rewrite these sentences accordingly.

16. *L348: I think it would be helpful to show this somewhere in the manuscript. Again on L372-373, should the total sea-level change be quoted?*

**Author's reply:**

The sterodynamic sea-level responses will be included in the revised manuscript (see comment 13). We will also rewrite the last paragraph (see also comment 15).

**Changes in manuscript:**

The manuscript will be changed accordingly.

Technical Points

1. *L69: “which occurs at  $\Delta F_H = 0.03 Sv$ ” ?*

**Author’s reply:**

This is the 100-year timescale of the AMOC collapse.

**Changes in manuscript:**

This will be clarified in the revised manuscript.

2. *L151: “quantity” ?*

**Author’s reply:**

Agreed.

**Changes in manuscript:**

Will be corrected.

3. *L220: Better to put these values in a table?*

**Author’s reply:**

Agreed, these values can be put in a table.

**Changes in manuscript:**

We will add a table in the Appendix.

4. *L253: salinity is already a concentration.*

**Author’s reply:**

Agreed.

**Changes in manuscript:**

We will remove ‘concentration’.



5. *L304: “of the Earth system” ?*

**Author’s reply:**

Agreed.

**Changes in manuscript:**

Will be corrected.

6. *L306: “primarily” ?*

**Author’s reply:**

Agreed.

**Changes in manuscript:**

Will be corrected.

7. *L360: “...which allows us to...” ?*

**Author’s reply:**

Agreed.

**Changes in manuscript:**

Will be corrected.

8. *Figure 4: A lot of the text here (and in other figures) is very small – could the authors increase the size? Moreover, some of the inset panels clutter the figures.*

**Author’s reply:**

We will increase the fontsize in panels 4a,b,c and 6a,b. We will remove the insets in panels 2b,c,d to declutter the panels, these DSL differences can be moved to the Appendix.

**Changes in manuscript:**

We will incorporate these changes in the revision.

9. *Figure 7: are panels b-d the total steric contribution, or just the thermosteric contribution, as shown in panel a? Are we meant to compare panel a to panels b-d?*

**Author's reply:**

Panels b,c,d display the total steric contribution, as is mentioned in the caption and Lines 268 – 270.

**Changes in manuscript:**

No changes needed.
